# Supplementary material for: Association of Prenatal Exposure to Early-Life Adversity With Neonatal Brain Volumes at Birth
Source: PubMed Central journal article supplement (PMC9006107; doi:10.1001/jamanetworkopen.2022.7045), 2022-04-12
Supplement: jamanetwopen-e227045-s001.pdf [file jamanetwopen-e227045-s001.pdf]

## Supplementary Online Content

Triplett RL, Lean RE, Parikh A, et al. Association of prenatal exposure to early-life adversity with neonatal brain volumes at birth. *JAMA Netw Open*. 2022;5(4):e227045.  
doi:10.1001/jamanetworkopen.2022.7045

**eFigure.** Participant Flow From Study Enrollment to Inclusion in Current Analysis

**eMethods.** Supplemental Methods

**eTable 1.** Identification of Covariates of Interest Associated With Neonatal Volumetric MRI Measures at Birth (N=280)

**eTable 2.** Identification of Potential Covariates of Interest Associated With Infant Sex (N=280)

**eTable 3.** Comparison of Full-term Infants Excluded Due to Missing/Low-Quality MRI Data

**eTable 4.** Comparison of Full Cohort and Infants Excluded From (Largely Due to Prematurity) the Current Study

**eTable 5.** Full Results of Hierarchical Linear Regression Linking Maternal Social Disadvantage and Psychosocial Stress With Structural MRI Measures at Birth (N=280)

**eTable 6.** Hierarchical Linear Regression Linking Maternal Social Disadvantage and Psychosocial Stress with Total Brain Volumes (TBV) at Birth (N=280)

**eTable 7.** Hierarchical Linear Regression Exploring Hemispheric Effects of Maternal Social Disadvantage and Psychosocial Stress (N=280)

This supplementary material has been provided by the authors to give readers additional information about their work.

**eFigure.** Participant Flow From Study Enrollment to Inclusion in Current Analysis

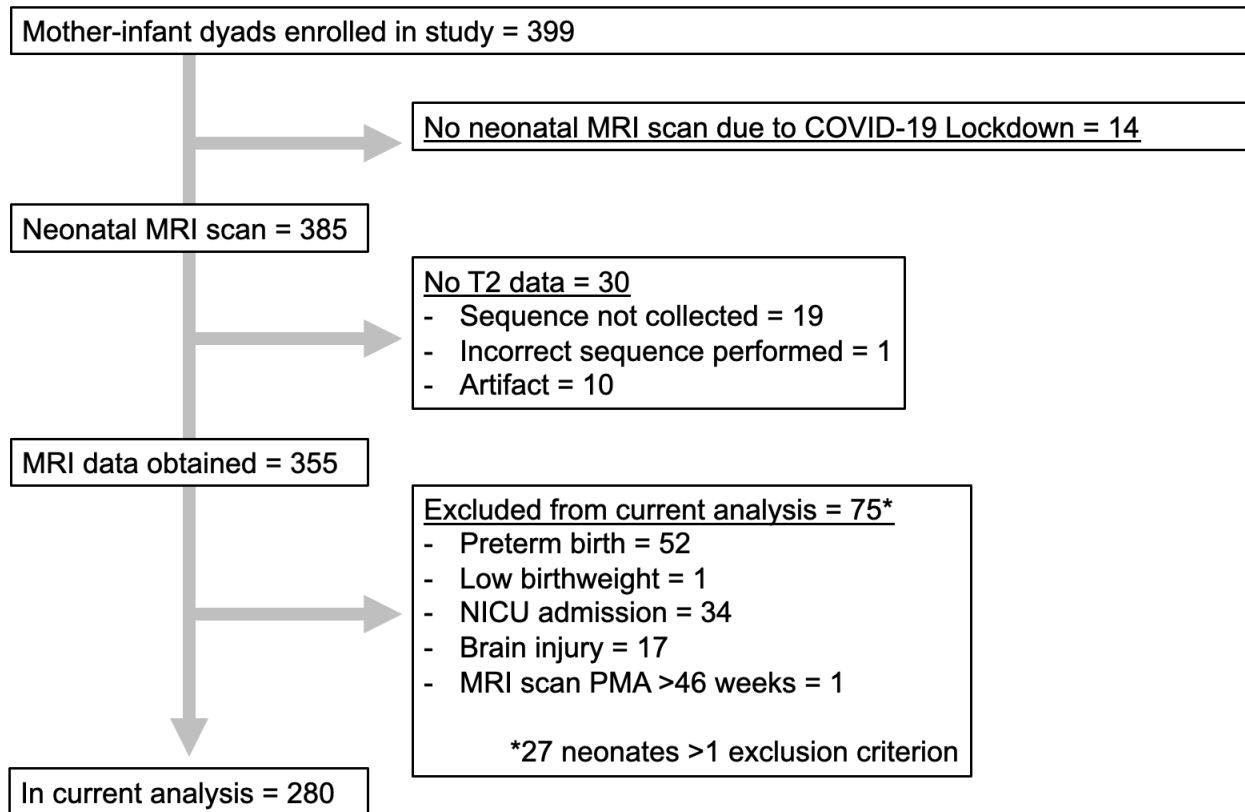

## **eMethods.** Supplemental Methods

**Maternal Measures in the Social Disadvantage Construct.** Health insurance status (private, public/no insurance) and highest educational level were obtained at study entry (during the first trimester). Household income and composition were obtained in each of the three trimesters and generated the Income to Needs Ratio (I/R).<sup>1</sup> An I/R of 1.0 is equivalent to the federal poverty line. Home addresses were obtained at birth and used to calculate the national Area Deprivation Index (ADI) percentile. The ADI scores neighborhood disadvantage using US Census data regarding poverty, education, housing, and employment, with higher values indicating greater disadvantage.<sup>2</sup> The Diet History Questionnaire II (DHQ-II),<sup>3</sup> was obtained at the time of neonatal scan. The DHQ-II is a yearly food frequency measure used to characterize nutrition via the Healthy Eating Index (HEI).<sup>4</sup>

**Maternal Measures in the Psychosocial Stress Construct.** Psychological measures of the Perceived Stress Scale (PSS)<sup>5</sup> and the Edinburgh Postnatal Depression Scale (EPDS)<sup>6</sup> were collected in each trimester. The Stress and Adversity Inventory (STRAIN)<sup>7</sup> is a composite measure of stressful and traumatic life experiences that was obtained at time of neonatal scan ( $n=186$ ) or at follow-up at one or two years ( $n=77$ ). On post-hoc analyses, we did not find differences in the STRAIN stressful/traumatic life event count ( $t$ -statistic=.85,  $two$ -tailed  $p=0.4$ ) or severity ( $t$ -statistic=1.01,  $two$ -tailed  $p=0.3$ ) between mothers who had this collected at birth or at subsequent follow up. The Everyday Discrimination Scale (EDS) was obtained at time of neonatal scan and was scored for the “day-to-day” experience of racial discrimination, with participant response choices that ranged from “never” or “less than once a year” to “every day”.<sup>8</sup>

**Latent Constructs.** Confirmatory factor analysis, distinct from exploratory factor analysis, confirms that variables identified *a priori* load on each factor. MPlus software was used to validate our *a priori* grouping of early life adversity variables into a *Social Disadvantage* latent

factor (variables listed above) and a *Psychosocial Stress* factor (variables listed above).

Maximum likelihood estimation was used to derive latent factor scores for these two composite measures for all participants, despite occasional missing datapoints in observed variables.<sup>9</sup> Self-reported race was highly correlated with Social Disadvantage, offering no additional improvement to the model after other variables were accounted for and, thus, it was not included in either the latent Social Disadvantage or Psychosocial Stress composites.

Additionally, maternal substance use, health, and BMI all have complex relationships with both SES and psychosocial factors. Therefore, we analyzed these measures independently of our defined constructs of Social Disadvantage and Psychosocial Stress.

***MRI Data Collection, Preprocessing, and Brain Volumetric Measures.*** T1- and T2-weighted and spin echo fieldmap data were acquired with the following sequence parameters, T1: repetition time (TR)=2400ms, echo time (TE)=2.22ms, voxel size=0.8×0.8×0.8 mm<sup>3</sup>; T2: TR=3200/4500ms, TE=563ms, tissue T2=160ms, voxel size=0.8×0.8×0.8 mm<sup>3</sup>, and spin echo: TR=8000ms, TE=66ms, voxel size=2×2×2 mm<sup>3</sup>; 2 mm isotropic, multiband factor (MB)=1.

The T2-weighted images were first reviewed by a highly experienced imaging scientist (D.A.) and pediatric neurologist (C.D.S.) and evaluated based on image quality and estimated subject motion. Subjects determined to have severe motion during the scan ( $n=10$ ) were not included in subsequent analyses.

The T2-weighted images were then preprocessed using the following standard steps: gradient and readout distortion correction using the Human Connectome Project preprocessing pipeline,<sup>10</sup> FSL axis reorientation to the MNI152 standard-space template,<sup>11</sup> image denoising using Advanced Normalization Tools for Brain and Image Analysis (ANTs) Registration Suite,<sup>12</sup> and co-registration using the Washington University School of Medicine Neuroimaging Laboratory (NIL)'s 4-dimensional floating point (4dfp)-based image analysis.<sup>13</sup> The resulting T2

images were then used as input for Melbourne Children's Regional Infant Brain atlas Surface (M-CRIB-S) segmentation and surface extraction toolkit, which automatically generated anatomical volume segmentations and reconstructed cortical surfaces.<sup>14,15</sup> The M-CRIB-S toolkit included N4 bias field correction and brain extraction, as well as automatic segmentation into white and gray matter, cerebellum, brainstem, and subcortical gray matter subdivisions corresponding to FreeSurfer-like labeling. Curvature-based spherical registration and mapping, alignment, and averaging were performed, allowing for spatial normalization within the cohort and to the M-CRIB atlas.

The segmentation volumes and the cortical surfaces were then projected on the T2 images (using Connectome Workbench<sup>16</sup> and ITK-SNAP<sup>17</sup> software packages) to qualitatively evaluate the concordance between segmentations and anatomic structures (including subcortical regions) and cortical surface reconstructions and anatomic gyral and sulcal morphometry. Segmentations and surfaces were rated independently by D.A. and a second, highly experienced rater (D.M.) for necessary edits as is standard with these analysis methods.<sup>18,19,20,21</sup> For a subset of subjects, segmentations were then manually edited (D.A. and D.M.) using the ITK-SNAP toolkit, and surfaces were regenerated using the M-CRIB-S toolkit. Edits were performed in all three planes to ensure accurate delineation of structures, primarily the supratentorial gray matter, white matter, and cerebrospinal fluid, also with minor edits of the subcortical structures and the cerebellum. Edited segmentations and surfaces were inspected iteratively, with additional minor edits, if necessary. Final segmentations and surfaces were reviewed and designated as complete by D.A. and C.D.S.

### eReferences

1. Brooks-Gunn J, Klebanov PK, Liaw F ruy. The learning, physical, and emotional environment of the home in the context of poverty: The infant health and development program. *Child Youth Serv Rev.* 1995;17(1-2):251-276. doi:10.1016/0190-7409(95)00011-Z

2. Kind AJH, Buckingham WR. Making Neighborhood-Disadvantage Metrics Accessible — The Neighborhood Atlas. *N Engl J Med*. 2018;378(26):2456-2458. doi:10.1056/NEJMp1802313
3. *Diet History Questionnaire*. National Institutes of Health, Epidemiology and Genomics Research Program, National Cancer Institute.; 2010.
4. Krebs-Smith SM, Pannucci TE, Subar AF, et al. Update of the Healthy Eating Index: HEI-2015. *J Acad Nutr Diet*. 2018;118(9):1591-1602. doi:10.1016/j.jand.2018.05.021
5. Cohen S, Kamarck T, Mermelstein R. A global measure of perceived stress. *J Health Soc Behav*. 1983;24(4):385-396.
6. Cox JL, Holden JM, Sagovsky R. Detection of Postnatal Depression: Development of the 10-item Edinburgh Postnatal Depression Scale. *Br J Psychiatry*. 1987;150(6):782-786. doi:10.1192/bjp.150.6.782
7. Slavich GM, Shields GS. Assessing Lifetime Stress Exposure Using the Stress and Adversity Inventory for Adults (Adult STRAIN): An Overview and Initial Validation. *Psychosom Med*. 2018;80(1):17-27. doi:10.1097/PSY.0000000000000534
8. Williams DR, Yan Yu, Jackson JS, Anderson NB. Racial Differences in Physical and Mental Health: Socio-economic Status, Stress and Discrimination. *J Health Psychol*. 1997;2(3):335-351. doi:10.1177/135910539700200305
9. Luby JL, Barch DM, Warner B, et al. *Modeling Prenatal Adversity/Advantage: Effects on Birth Weight*. MedRxiv; 2021. doi:10.1101/2021.12.16.21267938
10. Glasser MF, Sotiropoulos SN, Wilson JA, et al. The minimal preprocessing pipelines for the Human Connectome Project. *NeuroImage*. 2013;80:105-124. doi:10.1016/j.neuroimage.2013.04.127
11. Jenkinson M, Beckmann CF, Behrens TEJ, Woolrich MW, Smith SM. FSL. *NeuroImage*. 2012;62(2):782-790. doi:10.1016/j.neuroimage.2011.09.015
12. Manjón JV, Coupé P, Martí-Bonmatí L, Collins DL, Robles M. Adaptive non-local means denoising of MR images with spatially varying noise levels: Spatially Adaptive Nonlocal Denoising. *J Magn Reson Imaging*. 2010;31(1):192-203. doi:10.1002/jmri.22003
13. Snyder AZ, Acevedo H, Koller J. *4dfp Suite*. Washington University in St. Louis; 2021. <https://4dfp.readthedocs.io/>
14. Alexander B, Murray AL, Loh WY, et al. A new neonatal cortical and subcortical brain atlas: the Melbourne Children's Regional Infant Brain (M-CRIB) atlas. *NeuroImage*. 2017;147:841-851. doi:10.1016/j.neuroimage.2016.09.068
15. Adamson CL, Alexander B, Ball G, et al. *Parcellation of the Cortex Using Surface-Based Melbourne Children's Regional Infant Brain Atlases (M-CRIB-S)*. Neuroscience; 2019. doi:10.1101/544304
16. *Connectome Workbench*. Washington University in St. Louis; 2020. <https://www.humanconnectome.org/software/connectome-workbench>

17. Yushkevich PA, Piven J, Hazlett HC, et al. User-guided 3D active contour segmentation of anatomical structures: Significantly improved efficiency and reliability. *NeuroImage*. 2006;31(3):1116-1128. doi:10.1016/j.neuroimage.2006.01.015
18. Qiu A, Rifkin-Graboi A, Chen H, et al. Maternal anxiety and infants' hippocampal development: timing matters. *Transl Psychiatry*. 2013;3(9):e306-e306. doi:10.1038/tp.2013.79
19. Wang C, Shen M, Guillaume B, et al. FKBP5 Moderates the Association between Antenatal Maternal Depressive Symptoms and Neonatal Brain Morphology. *Neuropsychopharmacol Off Publ Am Coll Neuropsychopharmacol*. 2018;43(3):564-570. doi:10.1038/npp.2017.232
20. Lehtola SJ, Tuulari JJ, Scheinin NM, et al. Newborn amygdalar volumes are associated with maternal prenatal psychological distress in a sex-dependent way. *NeuroImage Clin*. 2020;28:102380. doi:10.1016/j.nicl.2020.102380
21. Beare RJ, Chen J, Kelly CE, et al. Neonatal Brain Tissue Classification with Morphological Adaptation and Unified Segmentation. *Front Neuroinformatics*. 2016;10. doi:10.3389/fninf.2016.00012

**eTable 1.** Identification of Covariates of Interest Associated With Neonatal Volumetric MRI Measures at Birth (N=280)

| Volume               | Maternal BMI <sup>a</sup> |          | MMR Score |          | Maternal Marijuana Exposure <sup>b</sup> |          | Maternal Tobacco Use |          | Infant Birthweight |          | Infant PMA at scan |          | Infant Sex |          |
|----------------------|---------------------------|----------|-----------|----------|------------------------------------------|----------|----------------------|----------|--------------------|----------|--------------------|----------|------------|----------|
|                      | <i>r</i>                  | <i>p</i> | <i>r</i>  | <i>p</i> | <i>t</i>                                 | <i>p</i> | <i>t</i>             | <i>p</i> | <i>r</i>           | <i>p</i> | <i>r</i>           | <i>p</i> | <i>t</i>   | <i>p</i> |
| TBV                  | -.074                     | .28      | -.036     | .55      | -2.06                                    | .04      | -3.74                | <.001    | .432               | <.001    | .519               | <.001    | 6.33       | <.001    |
| Total cGM            | -.046                     | .50      | -.024     | .69      | -1.22                                    | .23      | -3.14                | .002     | .440               | <.001    | .618               | <.001    | 5.48       | <.001    |
| Total subcortical GM | -.084                     | .22      | -.047     | .44      | -1.30                                    | .20      | -3.77                | <.001    | .410               | <.001    | .618               | <.001    | 5.53       | <.001    |
| Total WM             | -.082                     | .23      | -.038     | .53      | -2.54                                    | .01      | -3.86                | <.001    | .373               | <.001    | .307               | <.001    | 6.19       | <.001    |
| Total Cerebellum     | -.076                     | .27      | -.039     | .52      | -1.41                                    | .16      | -2.69                | .008     | .372               | <.001    | .678               | <.001    | 5.24       | <.001    |
| Gyrification Index   | -.071                     | .30      | -.035     | .56      | 2.36                                     | .02      | -.64                 | .53      | .270               | <.001    | .472               | <.001    | 5.56       | <.001    |

MMR = Maternal Medical Risk, PMA = postmenstrual age, TBV = total brain volume, cGM = cortical gray matter, GM = gray matter, WM = white matter. *r*=Pearson's correlation coefficient. *t*=independent samples t-test statistic. *p* values are two-tailed. Values are unadjusted.

<sup>a</sup>Maternal pre-pregnancy BMI data available for n=218

<sup>b</sup>Marijuana exposure included all mothers with a urine drug screen positive for tetrahydrocannabinol metabolites and/or self-reported marijuana use during pregnancy



**eTable 2.** Identification of Potential Covariates of Interest Associated With Infant Sex (N=280)

| <b>Variable, mean (SD)</b> | <b>Males (n=149)</b> | <b>Females (n=131)</b> | <b><i>t</i></b> | <b><i>p</i></b> |
|----------------------------|----------------------|------------------------|-----------------|-----------------|
| Birthweight (g)            | 3316 (470)           | 3191 (500)             | 2.159           | <b>.03</b>      |
| PMA at Scan (weeks)        | 41.74 (1.27)         | 41.58 (1.30)           | 1.074           | .28             |
| Social Disadvantage        | -.086 (1.01)         | .004 (.921)            | .786            | .43             |
| Psychosocial Stress        | -.169 (.875)         | .049 (.891)            | -1.135          | .26             |

**eTable 3.** Comparison of Full-term Infants Excluded Due to Missing/Low-Quality MRI Data

|                                    | <b>Adequate MRI<br/>(n=280)</b> | <b>Missing/Low-<br/>Quality MRI<br/>(n=27*)</b> | $\chi^2$ | <b>p</b>    |
|------------------------------------|---------------------------------|-------------------------------------------------|----------|-------------|
| Males, n (%)                       | 149 (53)                        | 16 (59)                                         | .362     | .55         |
| Maternal Tobacco Use, n (%)        | 36 (13)                         | 3 (11)                                          | .068     | .80         |
| Maternal Marijuana Exposure, n (%) | 74 (26)                         | 5 (19)                                          | .806     | .37         |
|                                    |                                 |                                                 | <b>t</b> | <b>p</b>    |
| Birthweight (g), mean (SD)         | 3258 (488)                      | 3274 (532)                                      | .169     | .87         |
| PMA at Scan (weeks), mean (SD)     | 41.7 (1.3)                      | 42.8 (1.8)                                      | 3.17     | <b>.004</b> |
| Maternal MMR score, mean (SD)      | 1.0 (1.3)                       | 1.0 (1.0)                                       | -.009    | .99         |
| Social Disadvantage, mean (SD)     | -.04 (.97)                      | .178 (.82)                                      | 1.32     | .20         |
| Psychosocial Stress, mean (SD)     | -.11 (.88)                      | .16 (1.10)                                      | 1.55     | .12         |

\*n=3 infants met other exclusion criteria (e.g., preterm, NICU stay)

**eTable 4.** Comparison of Full Cohort<sup>9</sup> and Infants Excluded From (Largely Due to Prematurity) the Current Study

|                                    | <b>Current<br/>sample<br/>(n=280)</b> | <b>Included in Luby <i>et al.</i>,<br/>excluded from current<br/>sample (n=119)</b> | $\chi^2$ | <b>p</b>        |
|------------------------------------|---------------------------------------|-------------------------------------------------------------------------------------|----------|-----------------|
| Males, n (%)                       | 149 (53)                              | 72 (61)                                                                             | 1.80     | .18             |
| Maternal Tobacco Use, n (%)        | 36 (13)                               | 14(12)                                                                              | .091     | .76             |
| Maternal Marijuana Exposure, n (%) | 74 (26)                               | 22 (18)                                                                             | 2.89     | .09             |
|                                    |                                       |                                                                                     | <b>t</b> | <b>p</b>        |
| EGA at birth (weeks), mean (SD)    | 38.6 (1.0)                            | 36.5 (2.9)                                                                          | -7.61    | <b>&lt;.001</b> |
| Birthweight (g), mean (SD)         | 3258 (488)                            | 2845 (726)                                                                          | -5.68    | <b>&lt;.001</b> |
| PMA at Scan (weeks), mean (SD)     | 41.7 (1.3)                            | 41.4 (1.9)*                                                                         | -1.49    | .14             |
| Maternal MMR score, mean (SD)      | 1.0 (1.3)                             | 1.8 (2.3)                                                                           | 3.56     | <b>&lt;.001</b> |
| Social Disadvantage, mean (SD)     | -.04 (.97)                            | .10 (.90)                                                                           | 1.45     | .15             |
| Psychosocial Stress, mean (SD)     | -.11 (.88)                            | .27 (1.0)                                                                           | 3.58     | <b>&lt;.001</b> |

\*n = 105 with attempted MRI scans.

**eTable 5.** Full Results of Hierarchical Linear Regression Linking Maternal Social Disadvantage and Psychosocial Stress With Structural MRI Measures at Birth (N=280)

|                                | Step 1                          |       | Step 2                          |       |                | Change Statistics |                |
|--------------------------------|---------------------------------|-------|---------------------------------|-------|----------------|-------------------|----------------|
| <b>VOLUMES</b>                 | $\beta^a$                       | P     | $\beta^a$                       | P     | FDR-adjusted q | $\Delta R^2$      | F $\Delta$ (p) |
| <b>Cortical Gray Matter</b>    | R <sup>2</sup> = .542, p < .001 |       | R <sup>2</sup> = .558, p < .001 |       |                |                   |                |
| Sex                            | .231                            | <.001 | .236                            | <.001 | <.001          |                   |                |
| Birthweight                    | .285                            | <.001 | .244                            | <.001 | <.001          |                   |                |
| PMA at scan                    | .538                            | <.001 | .523                            | <.001 | <.001          |                   |                |
| Tobacco Use                    | -.064                           | .13   | -.028                           | .52   | .69            |                   |                |
| Disadvantage                   |                                 |       | -.130                           | .008  | .01            | .016              | .007           |
| Psychosocial Stress            |                                 |       | -.024                           | .59   | .64            |                   |                |
| <b>Subcortical Gray Matter</b> | R <sup>2</sup> = .533, p < .001 |       | R <sup>2</sup> = .559, p < .001 |       |                |                   |                |
| Sex                            | .232                            | <.001 | .237                            | <.001 | <.001          |                   |                |
| Birthweight                    | .248                            | <.001 | .197                            | <.001 | <.001          |                   |                |
| PMA at scan                    | .542                            | <.001 | .524                            | <.001 | <.001          |                   |                |
| Tobacco Use                    | -.105                           | .014  | -.059                           | .17   | .67            |                   |                |
| Disadvantage                   |                                 |       | -.156                           | .002  | .003           | .026              | <.001          |
| Psychosocial Stress            |                                 |       | -.046                           | .30   | .60            |                   |                |
| <b>White Matter</b>            | R <sup>2</sup> = .295, p < .001 |       | R <sup>2</sup> = .364, p < .001 |       |                |                   |                |
| Sex                            | .280                            | <.001 | .290                            | <.001 | <.001          |                   |                |
| Birthweight                    | .270                            | <.001 | .184                            | <.001 | .001           |                   |                |
| PMA at scan                    | .223                            | <.001 | .190                            | <.001 | <.001          |                   |                |
| Tobacco Use                    | -.123                           | .018  | -.049                           | .34   | .69            |                   |                |
| Disadvantage                   |                                 |       | -.282                           | <.001 | <.001          | .069              | <.001          |
| Psychosocial Stress            |                                 |       | -.025                           | .64   | .64            |                   |                |
| <b>Cerebellum</b>              | R <sup>2</sup> = .570, p < .001 |       | R <sup>2</sup> = .587, p < .001 |       |                |                   |                |
| Sex                            | .227                            | <.001 | .228                            | <.001 | <.001          |                   |                |
| Birthweight                    | .205                            | <.001 | .168                            | <.001 | <.001          |                   |                |
| PMA at scan                    | .617                            | <.001 | .605                            | <.001 | <.001          |                   |                |
| Tobacco Use                    | -.046                           | .26   | -.011                           | .79   | .79            |                   |                |
| Disadvantage                   |                                 |       | -.093                           | .05   | .05            | .017              | .004           |
| Psychosocial Stress            |                                 |       | -.077                           | .08   | .30            |                   |                |
|                                | Step 1                          |       | Step 2                          |       |                | Change Statistics |                |
| <b>REGIONS OF INTEREST</b>     | $\beta^a$                       | p     | $\beta^a$                       | p     | FDR-adjusted q | $\Delta R^2$      | F $\Delta$ (p) |
| <b>Left Hippocampus</b>        | R <sup>2</sup> = .197, p < .001 |       | R <sup>2</sup> = .221, p < .001 |       |                |                   |                |

|                                                   |                                 |        |                                 |        |       |      |       |
|---------------------------------------------------|---------------------------------|--------|---------------------------------|--------|-------|------|-------|
| Sex                                               | .154                            | .006   | .161                            | .003   | .008  |      |       |
| Birthweight                                       | .160                            | .005   | .109                            | .06    | .06   |      |       |
| PMA at scan                                       | .313                            | < .001 | .293                            | < .001 | <.001 |      |       |
| Tobacco Use                                       | -.075                           | .18    | -.033                           | .57    | .70   |      |       |
| Disadvantage                                      |                                 |        | -.177                           | .007   | .01   | .023 | .019  |
| Psychosocial Stress                               |                                 |        | .019                            | .75    | .93   |      |       |
| <b>Right Hippocampus</b>                          | R <sup>2</sup> = .197, p < .001 |        | R <sup>2</sup> = .220, p < .001 |        |       |      |       |
| Sex                                               | .134                            | .02    | .141                            | .01    | .02   |      |       |
| Birthweight                                       | .196                            | <.001  | .145                            | .01    | .02   |      |       |
| PMA at scan                                       | .283                            | <.001  | .262                            | <.001  | <.001 |      |       |
| Tobacco Use                                       | -.103                           | .06    | -.060                           | .29    | .58   |      |       |
| Disadvantage                                      |                                 |        | -.176                           | .007   | .01   | .023 | .02   |
| Psychosocial Stress                               |                                 |        | .013                            | .82    | .93   |      |       |
| <b>Left Amygdala</b>                              | R <sup>2</sup> = .377, p < .001 |        | R <sup>2</sup> = .408, p < .001 |        |       |      |       |
| Sex                                               | .290                            | < .001 | .298                            | <.001  | <.001 |      |       |
| Birthweight                                       | .184                            | <.001  | .126                            | .01    | .02   |      |       |
| PMA at scan                                       | .393                            | <.001  | .370                            | <.001  | <.001 |      |       |
| Tobacco Use                                       | -.133                           | .007   | -.083                           | .09    | .58   |      |       |
| Disadvantage                                      |                                 |        | -.200                           | <.001  | .003  | .031 | <.001 |
| Psychosocial Stress                               |                                 |        | .005                            | .92    | .93   |      |       |
| <b>Right Amygdala</b>                             | R <sup>2</sup> = .387, p < .001 |        | R <sup>2</sup> = .416, p < .001 |        |       |      |       |
| Sex                                               | .273                            | <.001  | .281                            | <.001  | <.001 |      |       |
| Birthweight                                       | .228                            | <.001  | .171                            | <.001  | .003  |      |       |
| PMA at scan                                       | .398                            | <.001  | .375                            | <.001  | <.001 |      |       |
| Tobacco Use                                       | -.105                           | .03    | -.056                           | .25    | .58   |      |       |
| Disadvantage                                      |                                 |        | -.194                           | <.001  | .003  | .029 | .001  |
| Psychosocial Stress                               |                                 |        | .005                            | .93    | .93   |      |       |
| <b>Standardized Left Hippocampus<sup>b</sup></b>  | R <sup>2</sup> .010, p = .43    |        | R <sup>2</sup> = .014, p = .57  |        |       |      |       |
| Sex                                               | -.075                           | .22    | -.073                           | .23    | .31   |      |       |
| PMA at scan                                       | -.055                           | .36    | -.051                           | .41    | .41   |      |       |
| Tobacco Use                                       | .014                            | .82    | .001                            | .99    | .99   |      |       |
| Disadvantage                                      |                                 |        | .017                            | .81    | .86   | .004 | .58   |
| Psychosocial Stress                               |                                 |        | .055                            | .41    | .92   |      |       |
| <b>Standardized Right Hippocampus<sup>b</sup></b> | R <sup>2</sup> = .024, p = .08  |        | R <sup>2</sup> = .027, p = .19  |        |       |      |       |

|                                                |                                 |          |                                 |          |                     |                          |                |
|------------------------------------------------|---------------------------------|----------|---------------------------------|----------|---------------------|--------------------------|----------------|
| Sex                                            | -.114                           | .06      | -.112                           | .07      | .11                 |                          |                |
| PMA at scan                                    | -.101                           | .09      | -.097                           | .11      | .18                 |                          |                |
| Tobacco Use                                    | -.021                           | .73      | -.032                           | .61      | .70                 |                          |                |
| Disadvantage                                   |                                 |          | .012                            | .86      | .86                 | .003                     | .67            |
| Psychosocial Stress                            |                                 |          | .049                            | .46      | .92                 |                          |                |
| <b>Standardized Left Amygdala<sup>b</sup></b>  | R <sup>2</sup> = .011, p = .40  |          | R <sup>2</sup> = .020, p = .36  |          |                     |                          |                |
| Sex                                            | .039                            | .52      | .041                            | .50      | .57                 |                          |                |
| PMA at scan                                    | -.078                           | .20      | -.066                           | .28      | .38                 |                          |                |
| Tobacco Use                                    | -.059                           | .33      | -.085                           | .18      | .58                 |                          |                |
| Disadvantage                                   |                                 |          | .056                            | .42      | .67                 | .009                     | .28            |
| Psychosocial Stress                            |                                 |          | .062                            | .35      | .92                 |                          |                |
| <b>Standardized Right Amygdala<sup>b</sup></b> | R <sup>2</sup> = .004, p = .78  |          | R <sup>2</sup> = .012, p = .64  |          |                     |                          |                |
| Sex                                            | .010                            | .87      | .013                            | .83      | .83                 |                          |                |
| PMA at scan                                    | -.060                           | .32      | -.051                           | .41      | .41                 |                          |                |
| Tobacco Use                                    | -.020                           | .74      | -.043                           | .50      | .70                 |                          |                |
| Disadvantage                                   |                                 |          | .040                            | .56      | .75                 | .008                     | .32            |
| Psychosocial Stress                            |                                 |          | .070                            | .29      | .92                 |                          |                |
|                                                | <b>Step 1</b>                   |          | <b>Step 2</b>                   |          | <b>FDR-adjusted</b> | <b>Change Statistics</b> |                |
| <b>Gyrification Index</b>                      | <b>β<sup>a</sup></b>            | <b>p</b> | <b>β<sup>a</sup></b>            | <b>p</b> | <b>q</b>            | <b>ΔR<sup>2</sup></b>    | <b>F Δ (p)</b> |
|                                                | R <sup>2</sup> = .264, p < .001 |          | R <sup>2</sup> = .312, p < .001 |          |                     |                          |                |
| Sex                                            | .104                            | .05      | .115                            | .03      | .03                 |                          |                |
| Birthweight                                    | .170                            | .002     | .098                            | .07      | .07                 |                          |                |
| PMA at scan                                    | .432                            | <.001    | .402                            | <.001    | <.001               |                          |                |
| Tobacco Use                                    | .037                            | .48      | .097                            | .07      | .07                 |                          |                |
| Disadvantage                                   |                                 |          | -.260                           | <.001    | <.001               | .048                     | <.001          |
| Psychosocial Stress                            |                                 |          | .042                            | .46      | .46                 |                          |                |

<sup>a</sup> Standardized coefficient values.

<sup>b</sup> Birthweight was not included as an independent variable for relative region of interest volumes adjusted for total brain volume to avoid overfitting. Standardized region of interest volumes were computed as the volume of the region divided by total brain volume.

**eTable 6.** Hierarchical Linear Regression Linking Maternal Social Disadvantage and Psychosocial Stress with Total Brain Volumes (TBV) at Birth (N=280)

| Total Brain Volume  | Step 1                          |        | Step 2                          |        | Change Statistics |                |
|---------------------|---------------------------------|--------|---------------------------------|--------|-------------------|----------------|
|                     | $\beta^a$                       | p      | $\beta^a$                       | p      | $\Delta R^2$      | F $\Delta$ (p) |
|                     | R <sup>2</sup> = .468, p < .001 |        | R <sup>2</sup> = .510, p < .001 |        |                   |                |
| Sex                 | .275                            | < .001 | .282                            | < .001 |                   |                |
| Birthweight         | .289                            | < .001 | .407                            | < .001 |                   |                |
| PMA at scan         | .432                            | < .001 | .221                            | < .001 |                   |                |
| Tobacco Use         | -.099                           | .029   | -.040                           | .37    |                   |                |
| Disadvantage        |                                 |        | -.214                           | < .001 | .043              | < .001         |
| Psychosocial Stress |                                 |        | -.034                           | .47    |                   |                |

<sup>a</sup> Standardized coefficient values

**eTable 7.** Hierarchical Linear Regression Exploring Hemispheric Effects of Maternal Social Disadvantage and Psychosocial Stress (N=280)

| VOLUMES                              | Step 1                          |       | Step 2                          |       | Change Statistics |                |
|--------------------------------------|---------------------------------|-------|---------------------------------|-------|-------------------|----------------|
|                                      | $\beta^a$                       | p     | $\beta^a$                       | p     | $\Delta R^2$      | F $\Delta$ (p) |
| <b>Left Hemispheric Cortical GM</b>  | R <sup>2</sup> = .539, p < .001 |       | R <sup>2</sup> = .556, p < .001 |       |                   |                |
| Sex                                  | .227                            | <.001 | .231                            | <.001 |                   |                |
| Birthweight                          | .280                            | <.001 | .237                            | <.001 |                   |                |
| PMA at scan                          | .542                            | <.001 | .526                            | <.001 |                   |                |
| Tobacco Use                          | -.063                           | .13   | -.026                           | .54   |                   |                |
| Disadvantage                         |                                 |       | -.136                           | .006  | .017              | .005           |
| Psychosocial Stress                  |                                 |       | -.022                           | .62   |                   |                |
| <b>Right Hemispheric Cortical GM</b> | R <sup>2</sup> = .538, p < .001 |       | R <sup>2</sup> = .553, p < .001 |       |                   |                |
| Sex                                  | .234                            | <.001 | .238                            | <.001 |                   |                |
| Birthweight                          | .289                            | <.001 | .250                            | <.001 |                   |                |
| PMA at scan                          | .531                            | <.001 | .516                            | <.001 |                   |                |
| Tobacco Use                          | -.064                           | .13   | -.029                           | .50   |                   |                |
| Disadvantage                         |                                 |       | -.123                           | .01   | .015              | .01            |
| Psychosocial Stress                  |                                 |       | -.025                           | .57   |                   |                |
| <b>Left Hemispheric Cerebral WM</b>  | R <sup>2</sup> = .291, p < .001 |       | R <sup>2</sup> = .365, p < .001 |       |                   |                |
| Sex                                  | .279                            | <.001 | .289                            | <.001 |                   |                |
| Birthweight                          | .272                            | <.001 | .182                            | <.001 |                   |                |
| PMA at scan                          | .217                            | <.001 | .183                            | <.001 |                   |                |
| Tobacco Use                          | -.121                           | .02   | -.043                           | .40   |                   |                |
| Disadvantage                         |                                 |       | -.297                           | <.001 | .075              | <.001          |
| Psychosocial Stress                  |                                 |       | -.020                           | .71   |                   |                |
| <b>Right Hemispheric Cerebral WM</b> | R <sup>2</sup> = .295, p < .001 |       | R <sup>2</sup> = .358, p < .001 |       |                   |                |
| Sex                                  | .280                            | <.001 | .289                            | <.001 |                   |                |
| Birthweight                          | .267                            | <.001 | .185                            | <.001 |                   |                |
| PMA at scan                          | .227                            | <.001 | .196                            | <.001 |                   |                |
| Tobacco Use                          | -.125                           | .02   | -.053                           | .30   |                   |                |
| Disadvantage                         |                                 |       | -.266                           | <.001 | .063              | <.001          |
| Psychosocial Stress                  |                                 |       | -.030                           | .58   |                   |                |
| <b>Left Cerebellum</b>               | R <sup>2</sup> = .551, p < .001 |       | R <sup>2</sup> = .565, p < .001 |       |                   |                |

|                             |                                 |       |                                 |       |      |       |
|-----------------------------|---------------------------------|-------|---------------------------------|-------|------|-------|
| Sex                         | .214                            | <.001 | .213                            | <.001 |      |       |
| Birthweight                 | .195                            | <.001 | .167                            | <.001 |      |       |
| PMA at scan                 | .612                            | <.001 | .604                            | <.001 |      |       |
| Tobacco Use                 | -.052                           | .21   | -.024                           | .57   |      |       |
| Disadvantage                |                                 |       | -.061                           | .21   | .014 | .012  |
| Psychosocial Stress         |                                 |       | -.089                           | .05   |      |       |
| <b>Right Cerebellum</b>     | R <sup>2</sup> = .566, p < .001 |       | R <sup>2</sup> = .587, p < .001 |       |      |       |
| Sex                         | .235                            | <.001 | .238                            | <.001 |      |       |
| Birthweight                 | .210                            | <.001 | .167                            | <.001 |      |       |
| PMA at scan                 | .609                            | <.001 | .594                            | <.001 |      |       |
| Tobacco Use                 | -.038                           | .35   | .001                            | .97   |      |       |
| Disadvantage                |                                 |       | -.122                           | .01   | .021 | .001  |
| Psychosocial Stress         |                                 |       | -.064                           | .14   |      |       |
| <b>Left Hemispheric GI</b>  | R <sup>2</sup> = .219, p < .001 |       | R <sup>2</sup> = .258, p < .001 |       |      |       |
| Sex                         | .057                            | .29   | .065                            | .22   |      |       |
| Birthweight                 | .143                            | .01   | .078                            | .17   |      |       |
| PMA at scan                 | .410                            | <.001 | .385                            | <.001 |      |       |
| Tobacco Use                 | .030                            | .57   | .085                            | .13   |      |       |
| Disadvantage                |                                 |       | -.220                           | <.001 | .039 | <.001 |
| Psychosocial Stress         |                                 |       | -.001                           | .99   |      |       |
| <b>Right Hemispheric GI</b> | R <sup>2</sup> = .252, p < .001 |       | R <sup>2</sup> = .301, p < .001 |       |      |       |
| Sex                         | .137                            | .01   | .150                            | .004  |      |       |
| Birthweight                 | .178                            | .001  | .107                            | .05   |      |       |
| PMA at scan                 | .403                            | <.001 | .372                            | <.001 |      |       |
| Tobacco Use                 | .040                            | .45   | .097                            | .07   |      |       |
| Disadvantage                |                                 |       | -.268                           | <.001 | .049 | <.001 |
| Psychosocial Stress         |                                 |       | .078                            | .17   |      |       |

<sup>a</sup> Standardized coefficient values
